# Supplementary material for: Mid-infrared spectroscopy of 1-cyanonaphthalene cation for astrochemical consideration
Source: Royal Society of Chemistry journal article supplement (doi:10.1039/d3cp05784d), 2024-01-01
Supplement: d3cp05784d1.pdf [file d3cp05784d1.pdf]

## Mid-infrared spectroscopy of 1-cyanonaphthalene cation for astrochemical consideration

### Supplementary Information

Julianna Palotás,<sup>1</sup> Francis C. Daly,<sup>1</sup> Thomas E. Douglas-Walker,<sup>1</sup> and Ewen K. Campbell<sup>1, a)</sup>  
*School of Chemistry, University of Edinburgh, Joseph Black Building, Kings Buildings, David Brewster Road,  
Edinburgh EH9 3FJ, UK*

#### VIBRATIONAL SPECTRUM OF 1-CNN<sup>+</sup>

Supplementary Table 1: Theoretical vibrational spectrum for 1-CNN<sup>+</sup> calculated with B3LYP/6-311+G(d,p). These harmonic vibrational frequencies are not scaled.

| Frequency<br>cm <sup>-1</sup> | IR Intensity<br>km mol <sup>-1</sup> |
|-------------------------------|--------------------------------------|
| 96.4811                       | 2.302                                |
| 134.4237                      | 4.0451                               |
| 160.1473                      | 2.085                                |
| 195.1337                      | 0.0175                               |
| 352.4561                      | 0.3915                               |
| 353.765                       | 0.7042                               |
| 412.979                       | 15.1987                              |
| 426.7545                      | 1.6737                               |
| 436.7784                      | 1.3859                               |
| 482.6889                      | 0.9804                               |
| 520.0865                      | 0.7291                               |
| 528.762                       | 4.0026                               |
| 600.0496                      | 1.2156                               |
| 642.0438                      | 0.1187                               |
| 688.6932                      | 5.1583                               |
| 735.536                       | 3.4059                               |
| 772.3591                      | 53.5917                              |
| 805.5288                      | 0.0728                               |
| 814.4496                      | 39.5099                              |
| 865.3156                      | 3.0543                               |
| 905.2601                      | 0.8754                               |
| 967.4357                      | 0.0195                               |
| 998.0272                      | 0.5573                               |
| 1022.2571                     | 0.1819                               |
| 1026.8969                     | 0.0081                               |
| 1030.817                      | 25.233                               |
| 1062.7431                     | 0.7272                               |
| 1094.8426                     | 1.6975                               |
| 1132.0589                     | 5.6244                               |
| 1194.9307                     | 35.2163                              |
| 1205.413                      | 4.3861                               |
| 1241.1139                     | 47.5891                              |
| 1253.8201                     | 146.8056                             |
| 1300.7081                     | 13.919                               |
| 1374.1414                     | 56.3955                              |
| 1403.741                      | 3.5901                               |
| 1435.3095                     | 34.9246                              |

*Continued on next page*

<sup>a)</sup> Corresponding author: e.k.campbell@ed.ac.uk

Supplementary Table 1 – *Continued from previous page*

| Frequency<br>$\text{cm}^{-1}$ | IR Intensity<br>$\text{km mol}^{-1}$ |
|-------------------------------|--------------------------------------|
| 1461.7486                     | 0.975                                |
| 1473.6637                     | 7.1372                               |
| 1512.1793                     | 0.4328                               |
| 1541.9639                     | 77.435                               |
| 1563.7494                     | 63.3084                              |
| 1623.463                      | 0.529                                |
| 2302.151                      | 112.0524                             |
| 3186.2976                     | 0.3993                               |
| 3188.0749                     | 1.8831                               |
| 3189.8613                     | 0.0807                               |
| 3200.9298                     | 1.6922                               |
| 3202.1043                     | 1.66                                 |
| 3211.0373                     | 2.5264                               |
| 3212.5844                     | 6.0202                               |

## ANHARMONIC CALCULATION

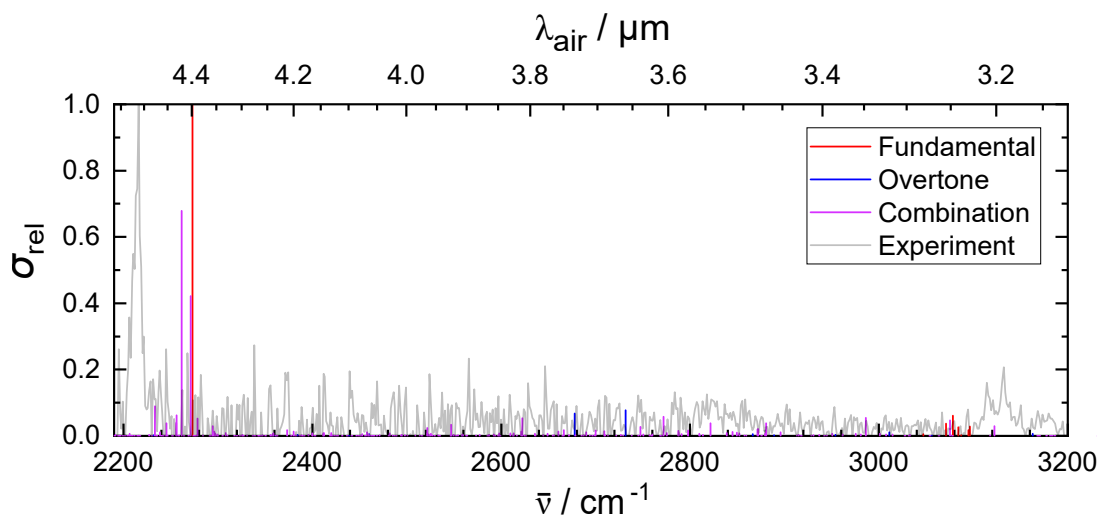Supplementary Figure 1. Anharmonic vibrational spectrum of 1-CNN<sup>+</sup> calculated with B3LYP/6-311+G(d,p) overlaid with the experimental spectrum. The anharmonic intensities are normalised to the CN fundamental.

COMPARISON OF 1-CNN AND 1-CNN<sup>+</sup>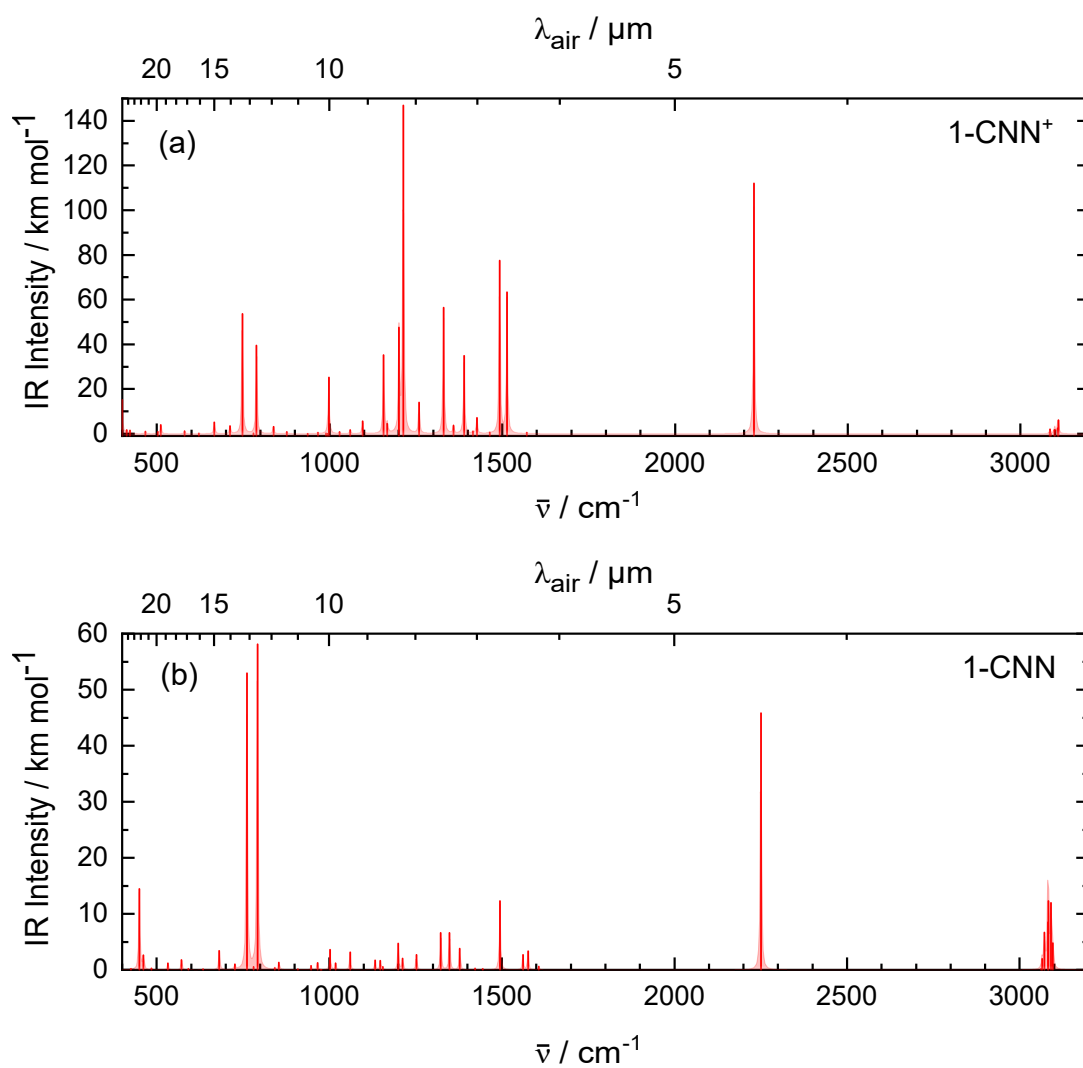

Supplementary Figure 2. Theoretical vibrational spectra of a) 1-CNN<sup>+</sup> and b) 1-CNN. The spectra were calculated at the DFT level with B3LYP/6-311+G(d,p). The vibrational frequencies are scaled by 0.9679.

EXPERIMENT AND THEORY FOR 1-CNN<sup>+</sup>-HE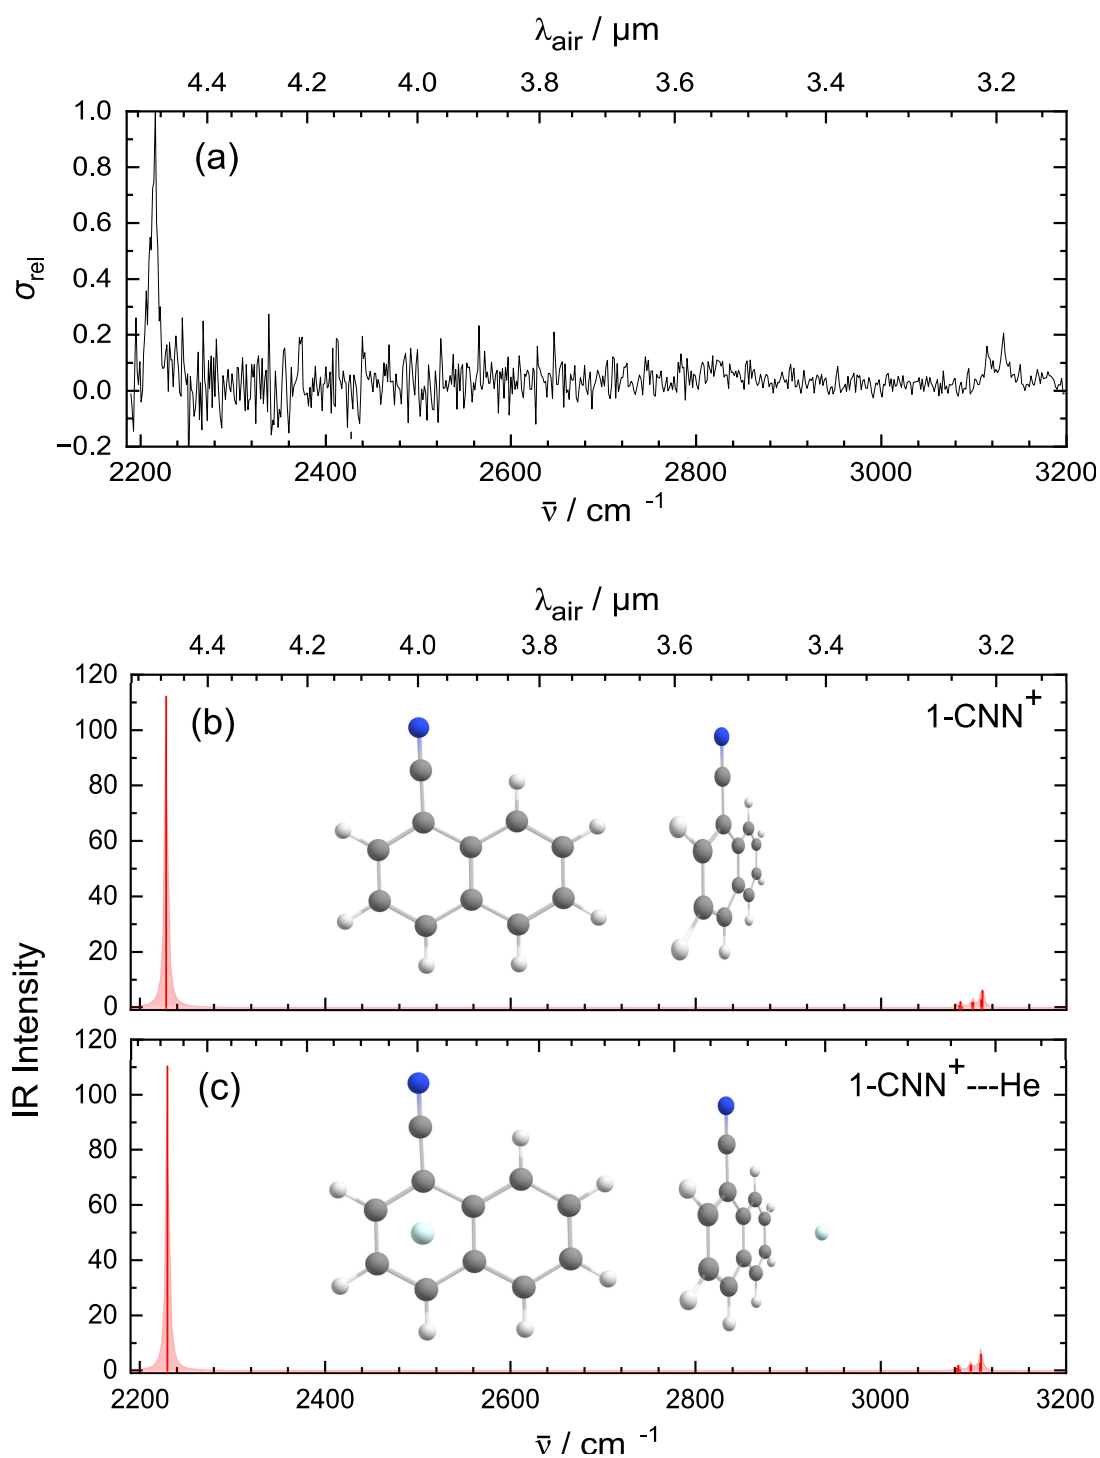

Supplementary Figure 3. (a) Photofragmentation spectrum of 1-CNN<sup>+</sup>-He. Harmonic frequency calculations using B3LYP/6-311+G(d,p) on 1-CNN<sup>+</sup>-He<sub>n</sub> with  $n = 0$  (b) and  $n = 1$  (c). The vibrational temperature was set to 4 K. The vibrational frequencies were convoluted with a Lorentzian function with a FWHM of 4  $\text{cm}^{-1}$ . All calculations used the 0.9679 scaling factor. The stick spectra have units of  $\text{km mol}^{-1}$ .
